# Supplementary material
Source: Royal Society of Chemistry journal article supplement (doi:10.1039/d6tb00307a)
Supplement: d6tb00307a1.pdf [file d6tb00307a1.pdf]

## Supporting Information

# In-situ Hydrothermal Synthesis of Zeolite-PVA Hemostatic Sponge and Its Rapid Hemostasis in a Lethal Massive Hemorrhage Model

Ni Zhu,<sup>#a,b</sup> Kun Li,<sup>#c</sup> Siyi Cao,<sup>b</sup> Chaojie Shi,<sup>b</sup> Liping Xiao,<sup>d</sup> Fei Pan,<sup>\*c</sup> Yifeng Shi,<sup>\*d</sup> Jie Fan <sup>\*d</sup> and Tanshi Li<sup>\*a,b</sup>

a. School of Medicine, Nankai University, Tianjin 300071, China

b. Department of General Surgery, The First Medical Center, Chinese PLA General Hospital, Beijing 100853, China

c. Department of Emergency, The First Medical Center, Chinese PLA General Hospital, Beijing 100853, China

d. Department of Chemistry, Zhejiang University, Hangzhou 310027, China

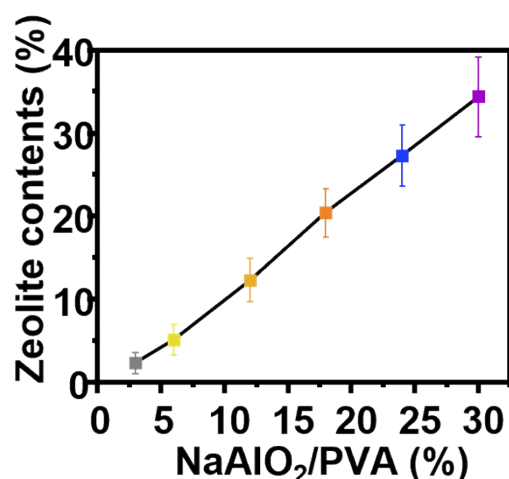

**Fig.S1** The zeolite content of the zeolite-polyvinyl alcohol (PVA) composite sponges synthesized under the conditions of different precursor concentrations.

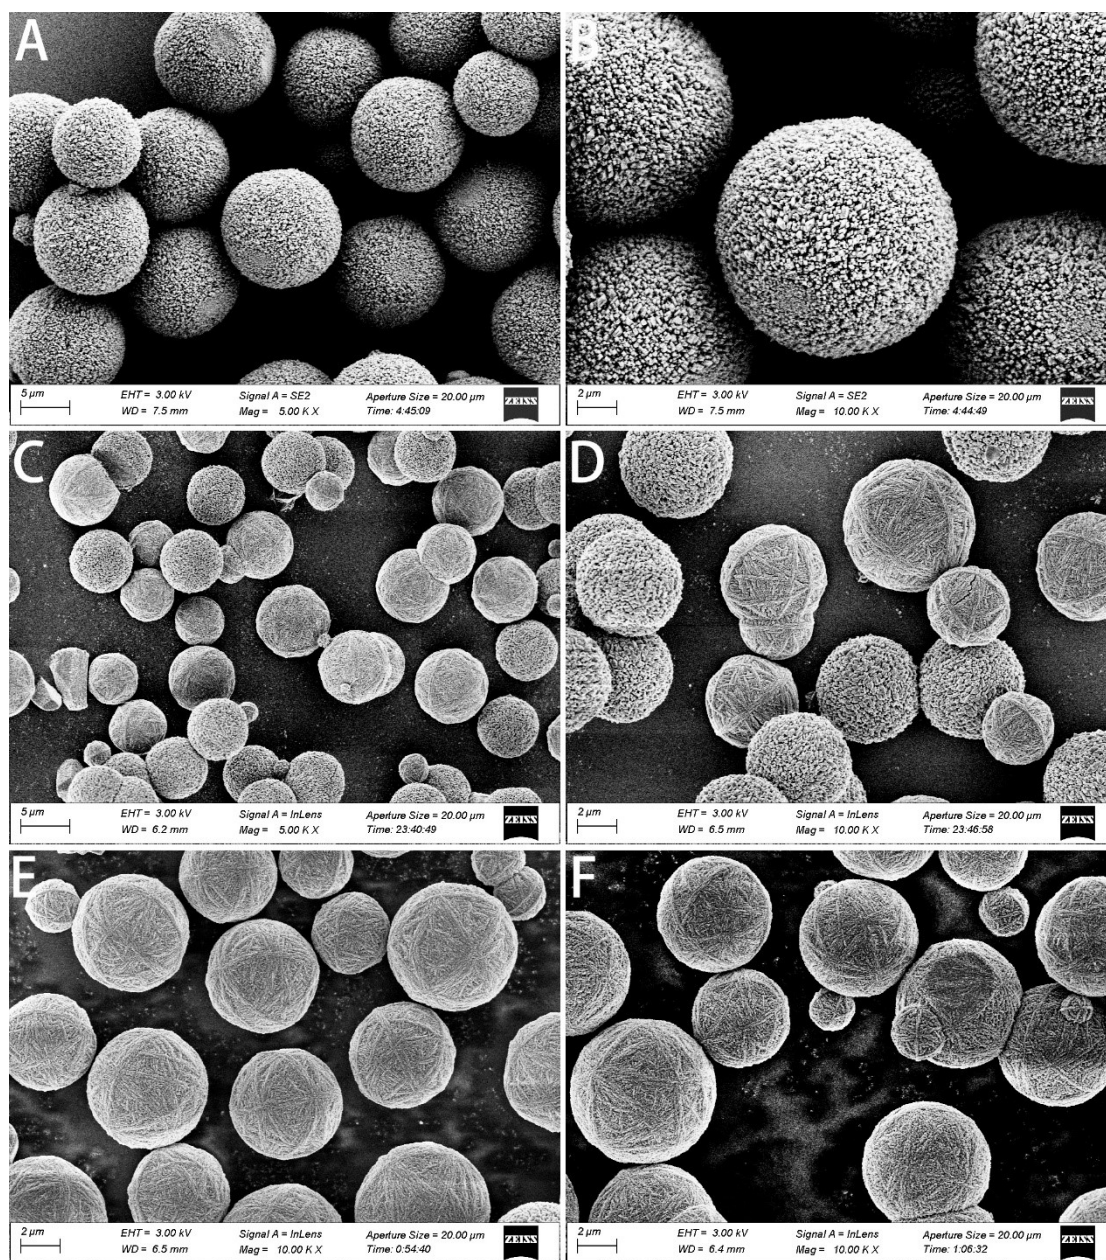

**Fig.S2** SEM images of P type zeolites with different particle morphology synthesized from precursors with different Si/Al/Na ratios: (A) and (B) bayberry-type zeolite P fabricated from precursor with Si/Al/Na of 8:2:7.2 (Sample S1), (C) and (D) bayberry-type and wool ball-type mixed zeolite P fabricated from precursor with Si/Al/Na of 9:2:9.9 (Sample S2), (E) and (F): wool ball-type zeolite P fabricated from precursor with Si/Al/Na of 10:2:13 (Sample S3).

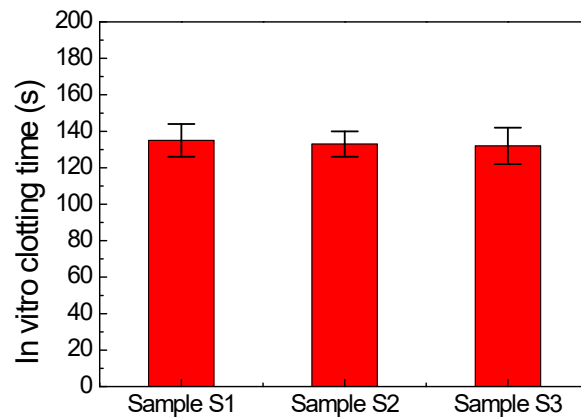

**Fig.S3** The *in vitro* clotting time of P-type zeolites powders with different particle morphologies measured with re-calcified porcine whole blood at 37°. No statistically significant differences were observed between any of the groups.

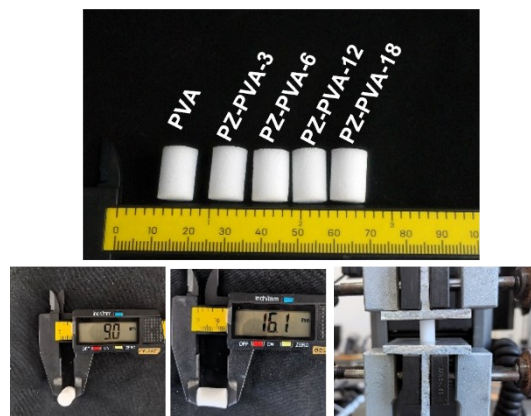

**Fig.S4** The photograph pictures of PVA, PZ-PVA-3, PZ-PVA-6, PZ-PVA-12, PZ-PVA-18, and the pictures taken at the actual testing site.

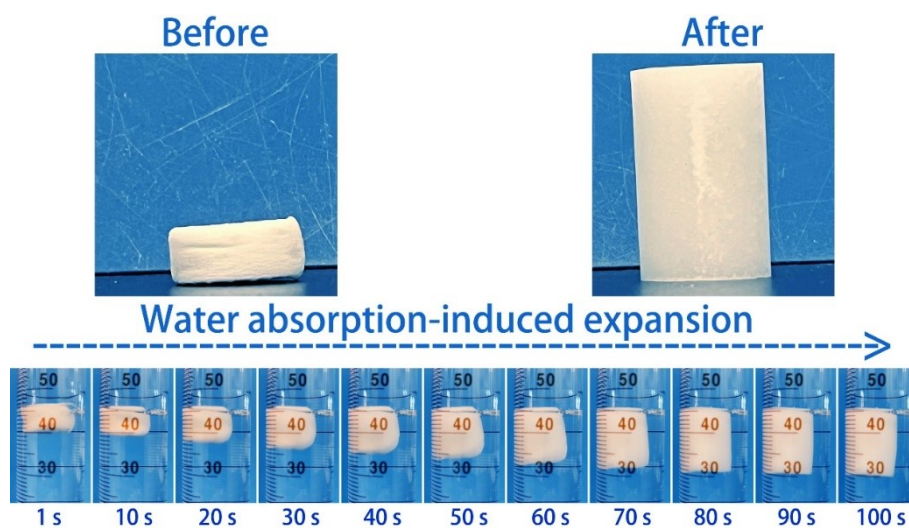

**Fig.S5** Photos of the zeolite-PVA sponge (PZ-PVA-12) in the axially compressed state and after water absorption and expansion, and the video screenshots of the sponge at different time points during the water absorption and expansion process.

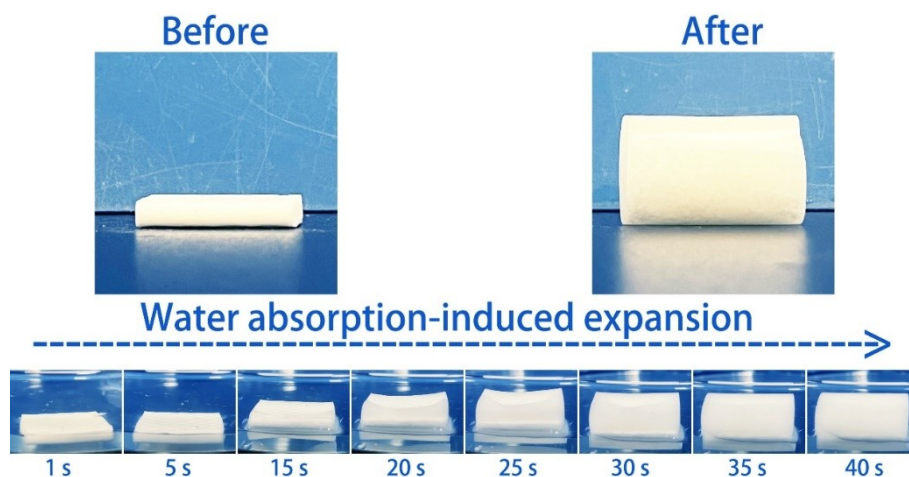

**Fig.S6** Photos of the zeolite-PVA sponge (PZ-PVA-12) in the lateral compressed state and after water absorption and expansion, and the video screenshots of the sponge at different time points during the water absorption and expansion process.

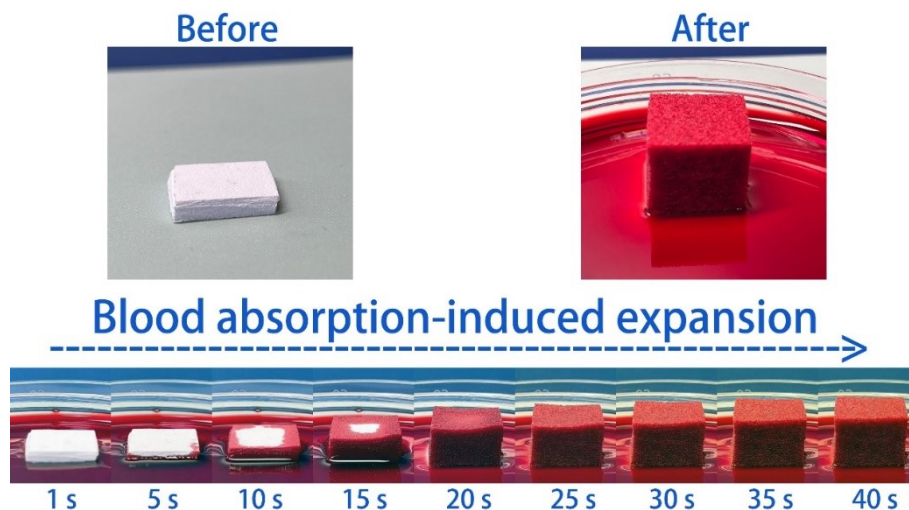

**Fig.S7** Photos of a compressed cubic zeolite-PVA sponge (PZ-PVA-12) and the sponge after blood absorption and expansion, and the video screenshots of the sponge at different time points during the blood absorption and expansion process.

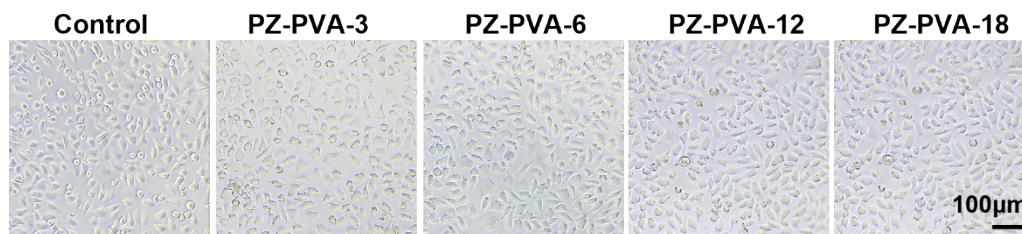

**Fig.S8** Optical micrographs of L929 cells after treatment with extracts of zeolite-PVA composite sponges (10 mg/mL) for 24 h.

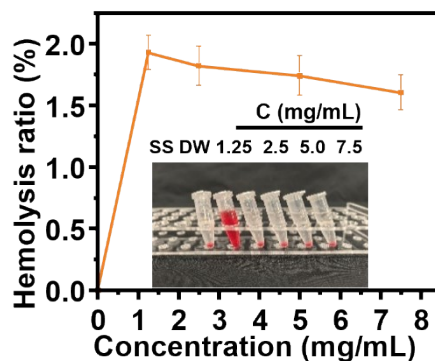

**Fig.S9** The hemolysis ratio of PZ-PVA-12 measured with different leaching solution (1.25 mg/ml, 2.5 mg/ml, 5 mg/ml, 7.5 mg/ml).
